# Supplementary material
Source: HighWire-hosted journal article supplement (https://bjgp.org/highwire/filestream/40345/field_highwire_adjunct_files/0/bjgp20X713861_suppl.pdf)
Supplement: bjgp20X713861_suppl.pdf [file bjgp20X713861_suppl.pdf]

Table S1 - Associations of group 3 outcomes - those unrelated to prescribing or dispensing status

|                |                                                                                                                                                                    | Dispensing        | Not dispensing    | Adjusted          |         |
|----------------|--------------------------------------------------------------------------------------------------------------------------------------------------------------------|-------------------|-------------------|-------------------|---------|
|                | Indicator                                                                                                                                                          | Median % (IQR)    | Median % (IQR)    | OR (CI)           | P-value |
| <b>AF006</b>   | Percentage of patients with atrial fibrillation CHA2DS2-VASc score recorded in preceding 12 months (excluding those with previous CHADS2 or CHA2DS2-VASc $\geq$ 2) | 94.6(90.9, 97.0)  | 94.8(91.0, 98.0)  | 1.00 (0.92, 1.08) | 0.98    |
| <b>HF002</b>   | Percentage of patients with heart failure confirmed echocardiogram or specialist assessment between 3 months before and 12 months after diagnosis                  | 91.3 (87.2, 94.7) | 92.1 (88.5, 96.0) | 0.99 (0.87, 1.14) | 0.93    |
| <b>STIA008</b> | Percentage of patients with stroke or TIA referred for further investigation between 3 months before or 1 month after the latest recorded stroke or first TIA      | 84.2 (79.1, 90.1) | 84.6 (78.6, 90.9) | 1.04 (0.98, 1.1)  | 0.20    |
| <b>STIA009</b> | Percentage of patients with stroke or TIA who have had influenza immunisation in the preceding 1 August to 31 March                                                | 77.4 (73.8, 81.3) | 75.1 (69.6,80.3)  | 1.01 (0.98, 1.05) | 0.49    |
| <b>DM012</b>   | Percentage of patients with diabetes with record of foot examination and risk classification within preceding 12 months                                            | 86.1 (81.3, 89.8) | 84.4 (77.9, 89.1) | 1.16 (1.1, 1.22)  | < 0.001 |
| <b>DM014</b>   | Percentage of patients newly diagnosed with diabetes in preceding 1 April to 31 March referred to a structured education programme within 9 months of diagnosis    | 71.0 (48.5,85.0)  | 76.5(57.1, 88.9)  | 0.96 (0.86, 1.08) | 0.52    |
| <b>DM018</b>   | Percentage of patients with diabetes who have had influenza immunisation in the preceding 1 August to 31 March                                                     | 77.5 (74.0, 80.9) | 75.3 (70.5, 79.6) | 1.01 (0.98, 1.04) | 0.49    |
| <b>AST002</b>  | Percentage of patients aged 8 or over with asthma, with measures of variability or reversibility recorded between 3 months before or any time after diagnosis      | 86.3 (81.0, 91.2) | 85.4 (80.3, 90.6) | 1.02 (0.97, 1.08) | 0.49    |
| <b>AST003</b>  | Percentage of patients with asthma who have had an asthma review in the preceding 12 months including assessment of control using the 3 RCP questions              | 72.9 (68.5, 77.8) | 72.9 (67.6, 77.6) | 1.09 (1.05, 1.14) | < 0.001 |
| <b>AST004</b>  | Percentage of patients with asthma aged $\geq$ 14 and < 20 for whom smoking status recorded in last 12 months                                                      | 85.3 (80.0, 90.9) | 87.1 (80.8,93.8)  | 1.09 (1.02, 1.17) | 0.010   |
| <b>COPD002</b> | Percentage of patients with COPD diagnosis confirmed by post bronchodilator spirometry between 3 months before and 12 months after diagnosis                       | 82.4 (76.5, 87.9) | 81.7 (75.5, 87.7) | 1.09 (1.03, 1.15) | 0.002   |
| <b>COPD003</b> | Percentage of patients with COPD who have had a review including assessment of breathlessness using MRC dyspnoea scale in preceding 12 months                      | 83.6 (77.2, 88.8) | 83.1 (75.8, 88.9) | 1.15 (1.08, 1.22) | < 0.001 |

|                |                                                                                                                                                                                                                                                     |                   |                   |                   |         |
|----------------|-----------------------------------------------------------------------------------------------------------------------------------------------------------------------------------------------------------------------------------------------------|-------------------|-------------------|-------------------|---------|
| <b>COPD004</b> | Percentage of patients with COPD with a record of FEV <sub>1</sub> in the preceding 12 months                                                                                                                                                       | 77.3 (69.2, 84.0) | 75.0 (66.0, 83.0) | 1.16 (1.09, 1.23) | < 0.001 |
| <b>COPD005</b> | Percentage of patients with COPD and MRC dyspnoea grade ≥3 in preceding 12 months, with a record of oxygen saturation value within preceding 12 months                                                                                              | 96.6 (93.6, 100)  | 96.6 (93.2, 100)  | 1.04 (0.95, 1.13) | 0.44    |
| <b>COPD007</b> | Percentage of patients with COPD who have had influenza immunisation in preceding 1 August to 31 March                                                                                                                                              | 82.0 (78.3, 86.1) | 79.7 (74.9, 84.2) | 1.01 (0.97, 1.04) | 0.70    |
| <b>DEM004</b>  | Percentage of patients with dementia whose care plan has been reviewed face-to-face in preceding 12 months                                                                                                                                          | 80.0 (73.3, 86.3) | 80.0 (72.7, 87.5) | 1.09 (1.03,1.16)  | 0.005   |
| <b>DEM005</b>  | Percentage of patients with a new diagnosis of dementia with a record of FBC, calcium, glucose, renal and liver function, thyroid function tests, serum vitamin B12 and folate levels recorded between 12 months before or 6 months after diagnosis | 70.0 (57.8, 81.9) | 66.7 (55.6, 81.3) | 1.10 (1.03, 1.17) | 0.005   |
| <b>DEP003</b>  | Percentage of patients aged ≥18 with new diagnosis of depression reviewed not earlier than 10 days after and not later than 56 days after date of diagnosis                                                                                         | 68.5 (61.5, 75.0) | 66.7 (58.1, 73.6) | 1.07 (1.01, 1.13) | 0.028   |
| <b>MH002</b>   | Percentage of patients with schizophrenia, bipolar affective disorder and other psychoses who have a comprehensive care plan documented in preceding 12 months                                                                                      | 83.3 (73.3, 89.7) | 83.6 (74.3, 89.5) | 1.11 (1.03, 1.21) | 0.008   |
| <b>MH003</b>   | Percentage of patients with schizophrenia, bipolar affective disorder and other psychoses who have a record of blood pressure in the preceding 12 months                                                                                            | 85.7 (79.5, 90.9) | 84.2 (77.8, 89.7) | 1.09 (1.03, 1.15) | 0.003   |
| <b>MH007</b>   | Percentage of patients with schizophrenia, bipolar affective disorder and other psychoses who have a record of alcohol consumption in preceding 12 months                                                                                           | 85.2 (75.3, 91.3) | 85.7 (77.2, 91.4) | 1.08 (1.00, 1.16) | 0.059   |
| <b>MH008</b>   | Percentage of women aged ≥25 and <65 with schizophrenia, bipolar affective disorder and other psychoses with cervical screening in preceding 5 years                                                                                                | 75.0 (66.7, 84.6) | 71.2 (62.5, 80.0) | 1.11 (1.05, 1.17) | <0.001  |
| <b>MH009</b>   | Percentage of patients on lithium therapy with a record of serum creatinine and TSH in preceding 9 months                                                                                                                                           | 100 (100, 100)    | 100 ( 93.3,100)   | 1.08 (0.91, 1.28) | 0.39    |
| <b>MH010</b>   | Percentage of patients on lithium therapy with record of lithium levels in therapeutic range in preceding 4 months                                                                                                                                  | 91.7 (80.0,100)   | 88.9 (73.3, 100)  | 1.07 (0.96, 1.19) | 0.22    |

|                |                                                                                                                                                                                                                                                                        |                   |                   |                   |         |
|----------------|------------------------------------------------------------------------------------------------------------------------------------------------------------------------------------------------------------------------------------------------------------------------|-------------------|-------------------|-------------------|---------|
| <b>CAN003</b>  | Percentage of patients with cancer who have a patient review recorded within 6 months of diagnosis                                                                                                                                                                     | 71.8 (61.1, 81.0) | 73.0 (61.4, 83.3) | 0.98 (0.92, 1.05) | 0.65    |
| <b>RA002</b>   | Percentage of patients with rheumatoid arthritis who have had face-to-face review in preceding 12 months                                                                                                                                                               | 89.7 (83.3, 93.3) | 90.0 (83.3, 94.1) | 1.16 (1.07, 1.26) | < 0.001 |
| <b>SMOK005</b> | Percentage of patients with any of CHD, PAD, stroke or TIA, hypertension, diabetes, COPD, CKD, asthma, schizophrenia, bipolar affective disorder or other psychoses and current smokers with a record of offer of support and treatment within the preceding 12 months | 97.2 (98.6, 95.1) | 97.1 (95.0, 98.7) | 1.11 (0.93, 1.32) | 0.25    |
